# Supplementary material
Source: MDPI journal article supplement (https://www.mdpi.com/1999-4907/9/5/253)
Supplement: s1 [file s1]

# 3 Spatial Distribution of Biomass and Woody Litter for 4 Bio-Energy in Biscay (Spain)

5 Esperanza Mateos <sup>1,\*</sup> and Leyre Ormaetxea <sup>2</sup>

6 <sup>1</sup> Department of Chemical and Environmental Engineering, University of the Basque Country UPV/EHU.  
7 Rafael Moreno 'Pitxitxi', n 3. 48013-Bilbao, Spain.

8 <sup>2</sup> Department of Mathematics, Faculty of Science and Technology, University of the Basque Country UPV/EHU.  
9 Barrio Sarriena s/n 48940, Leioa, Spain.

10 \* e-mail: esperanza.mateos@ehu.eus, telephone: +034946104343 and fax: +034946104300.

11 Academic Editor: name

12 Version May 2, 2018 submitted to Forests

## 13 1. Supplementary Material

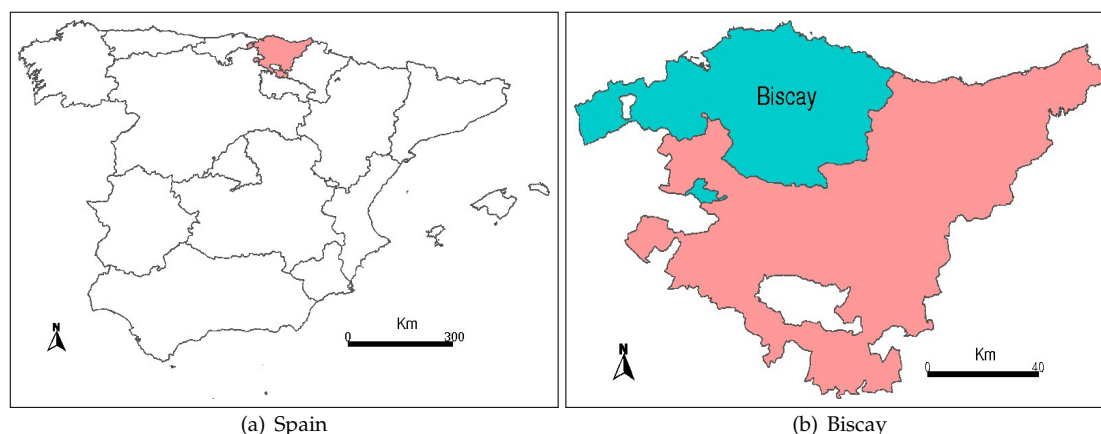

**Figure S1.** The target study area: province of Biscay (Spain)

14 © 2018 by the authors. Submitted to *Forests* for possible open access publication under the terms and conditions  
15 of the Creative Commons Attribution (CC BY) license (<http://creativecommons.org/licenses/by/4.0/>).

**Table S1.** Equations of forest biomass fractions ( $W_i$ ) expressed in kg (oven-dry-weight,  $(102 \pm 2^\circ \text{C}$ , 24h)), coefficient of determination ( $R^2$ ), and standard error of estimate (SEE).

|                   | Species            | Equations                                              | $R^2$ | SEE      |
|-------------------|--------------------|--------------------------------------------------------|-------|----------|
| $W_{ab}^*$        | <i>P. radiata</i>  | $e^{\frac{(0.19327)^2}{2}} e^{-2.61093 D^{2.48739}}$   | 0.977 | 0.193270 |
|                   | <i>E. globulus</i> | $e^{\frac{(0.15785)^2}{2}} e^{-1.33002 D^{2.19404}}$   | 0.980 | 0.157850 |
| $W_w^+$           | <i>P. radiata</i>  | $e^{\frac{(0.2000075)^2}{2}} e^{-3.02878 D^{2.56358}}$ | 0.976 | 0.200075 |
| $W_{b7}^\ddagger$ |                    | $e^{\frac{(0.52533)^2}{2}} e^{-10.5693 D^{3.64861}}$   | 0.710 | 0.525330 |
| $W_w + W_{b7}$    | <i>E. globulus</i> | $e^{\frac{(0.196830)^2}{2}} e^{-2.20421 D^{2.38196}}$  | 0.974 | 0.196830 |
| $W_{b2-7}^\S$     | <i>P. radiata</i>  | $e^{\frac{(0.615400)^2}{2}} e^{-4.12515 D^{2.1173}}$   | 0.746 | 0.615400 |
|                   | <i>E. globulus</i> | $e^{\frac{(0.442402)^2}{2}} e^{-2.67562 D^{2.19404}}$  | 0.822 | 0.442402 |
| $W_{b2}$          | <i>P. radiata</i>  | $e^{\frac{(0.616072)^2}{2}} e^{-3.53532 D^{1.75877}}$  | 0.669 | 0.616072 |
|                   | <i>E. globulus</i> | $e^{\frac{(0.333087)^2}{2}} e^{-2.64825 D^{1.61429}}$  | 0.858 | 0.333087 |
| $W_l^\$$          | <i>P. radiata</i>  | $e^{\frac{(0.333087)^2}{2}} e^{-5.03445 D^{2.05803}}$  | 0.739 | 0.609518 |
|                   | <i>E. globulus</i> | $e^{\frac{(0.333319)^2}{2}} e^{-2.05864 D^{1.61762}}$  | 0.859 | 0.333319 |
| $W_r^\parallel$   | <i>P. radiata</i>  | $e^{\frac{(0.309544)^2}{2}} e^{-2.78485 D^{2.14449}}$  | 0.939 | 0.309544 |

\*  $W_{ab}$  = aboveground biomass;  $^+ W_w$  = stem wood biomass;  $^\ddagger W_{b7}$  = wood and bark biomass on branches with 7 cm minimum top diameter;  $^\S W_{b2-7}$  = wood and bark biomass on branches with 7 cm maximum butt diameter and 2 cm minimum top diameter;  $^\$ W_l$  = leaf biomass;  $^\parallel W_r$  = root biomass;  $D$  = DBH (cm).

**Table S2.** Expansion factors (EFs) in plots from NFI4

|                       | S* plot (m <sup>2</sup> ) | EF      |
|-----------------------|---------------------------|---------|
| $7.5 \leq D^+ < 12.5$ | 78.54                     | 127.324 |
| $12.5 \leq D < 22.5$  | 314.16                    | 31.831  |
| $22.5 \leq D < 42.5$  | 706.86                    | 14.147  |
| $D \geq 42.5$         | 1963.50                   | 5.093   |

\* S = surface;  $^+ D$  = DBH (cm).

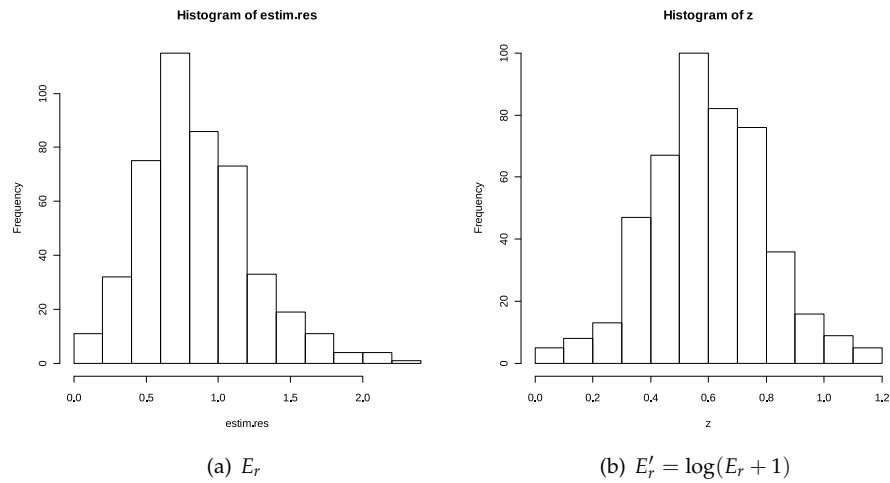

**Figure S2.** Histograms of the values of  $E_r$

**Table S3.** Normality test ( $p$  values) of the values of  $E_r$

|                                      | Anderson-Darling       | Cramer-von Mises       | Lilliefors Kolmogorov-Smirnov | Pearson's $\chi^2$ | Shapiro-Francia        | SD*   |
|--------------------------------------|------------------------|------------------------|-------------------------------|--------------------|------------------------|-------|
| Stratum 1<br>$E_r$                   | $2.635 \times 10^{-8}$ | $1.416 \times 10^{-6}$ | $5.467 \times 10^{-5}$        | 0.0001846          | $1.055 \times 10^{-7}$ | 0.208 |
| Stratum 1<br>$E'_r = \log(E_r + 1)$  | 0.3213                 | 0.2942                 | 0.1919                        | 0.1755             | 0.4482                 | 0.379 |
| Stratum 2<br>$E_r$                   | 0.04942                | 0.1153                 | 0.2351                        | 0.06318            | 0.02919                | 0.275 |
| Stratum 3<br>$E'_r = \sqrt{E_r}$     | 0.3743                 | 0.4000                 | 0.2684                        | 0.6194             | 0.3641                 | 0.216 |
| Stratum 9<br>$E_r$                   | 0.1953                 | 0.4031                 | 0.476                         | 0.1634             | 0.09016                | 0.642 |
| All Strata<br>$E'_r = \log(E_r + 1)$ | 0.07718                | 0.3057                 | 0.2273                        | 0.0778             | 0.006831               | 0.208 |

\* Standard deviation
