# Supplementary material
Source: MDPI journal article supplement (https://www.mdpi.com/1999-4907/9/5/253)

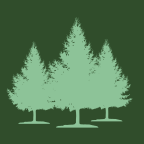

*forests*

Supplement: s1 [file s1]

**Histogram of estim.res**

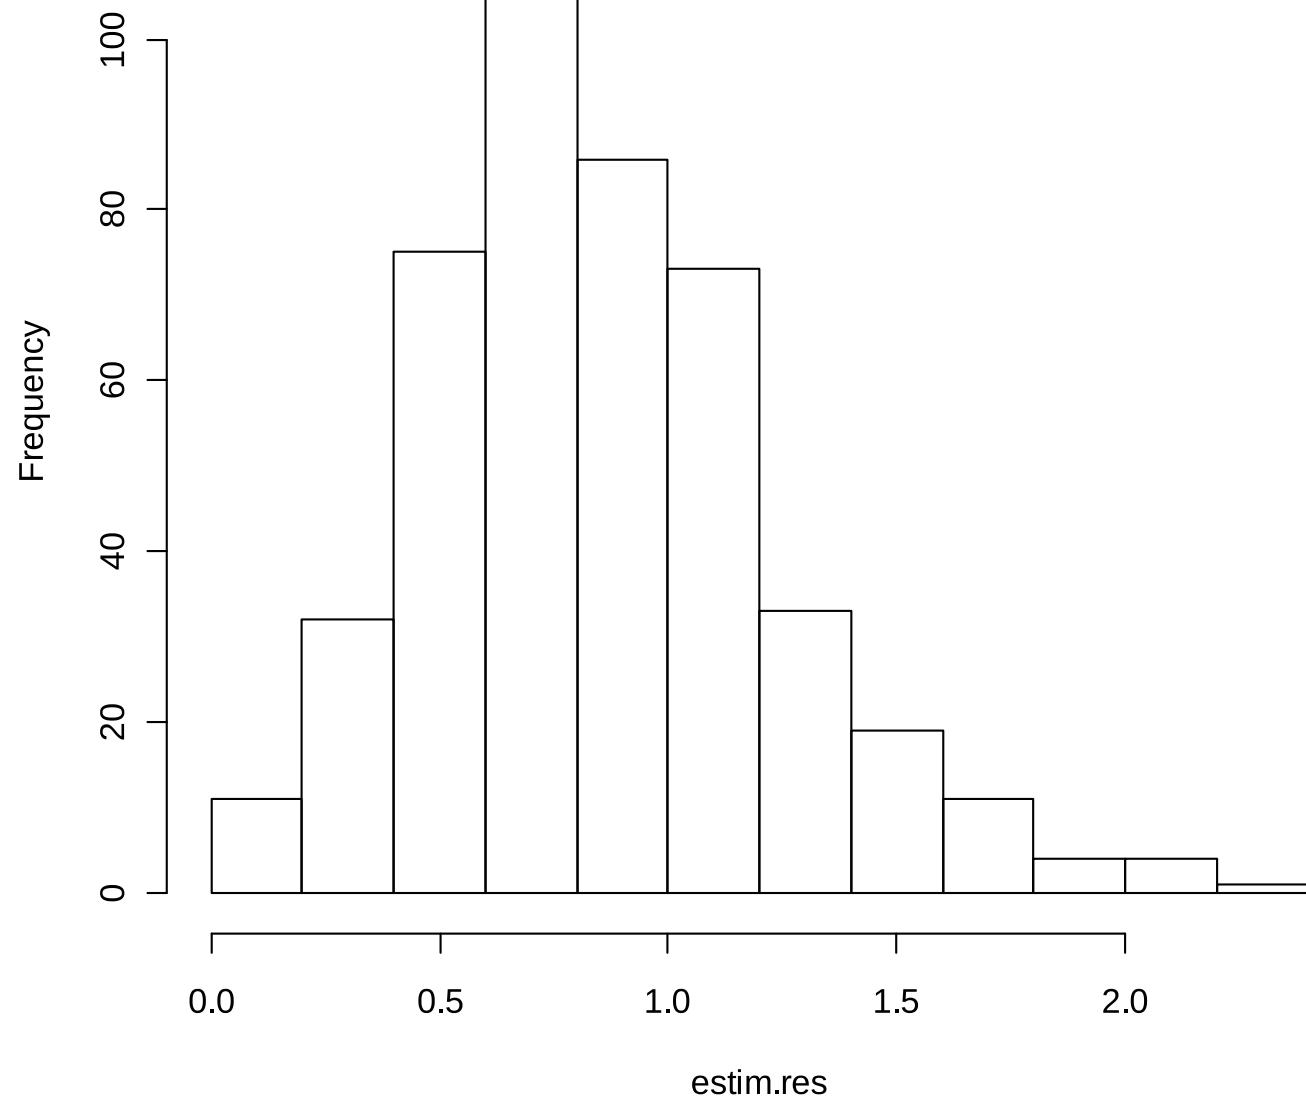

Supplement: s1 [file s1]

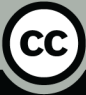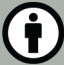

BY

Supplement: s1 [file s1]

**Histogram of  $z$**

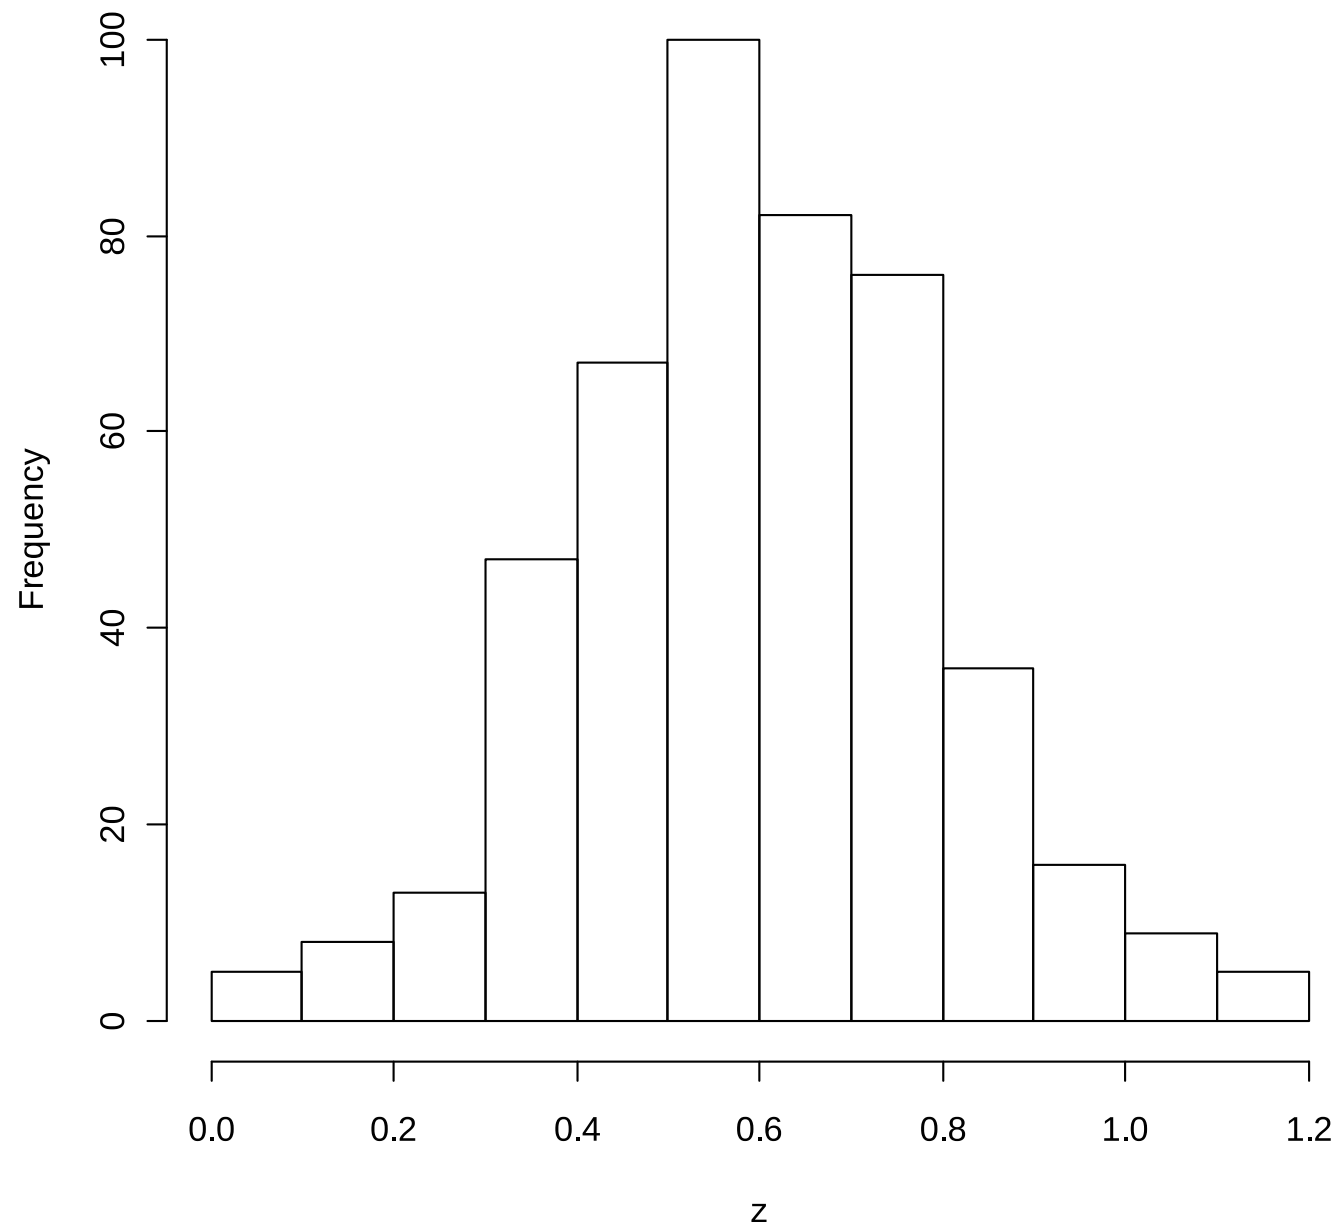

Supplement: s1 [file s1]

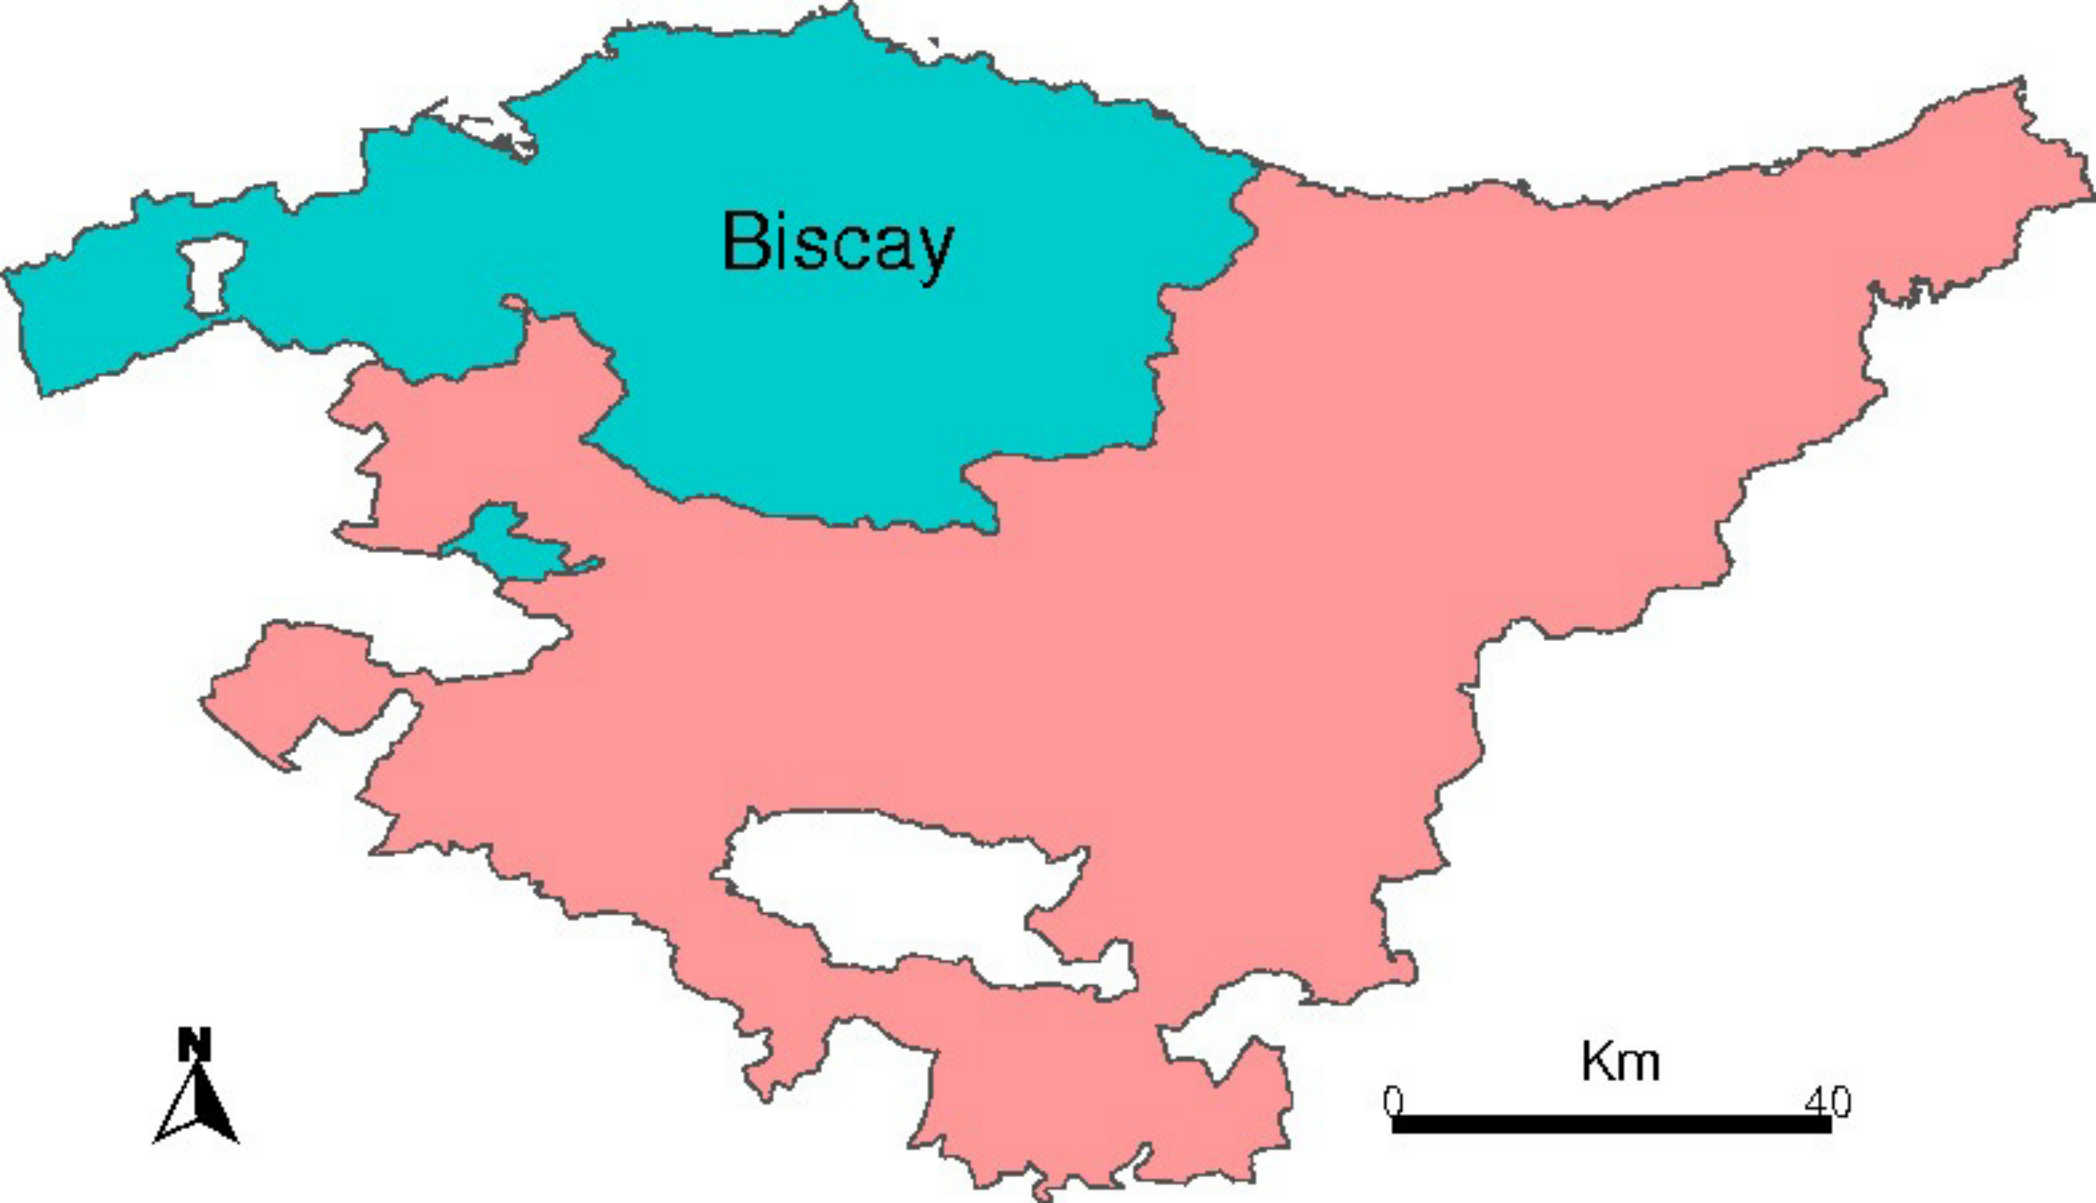

Supplement: s1 [file s1]

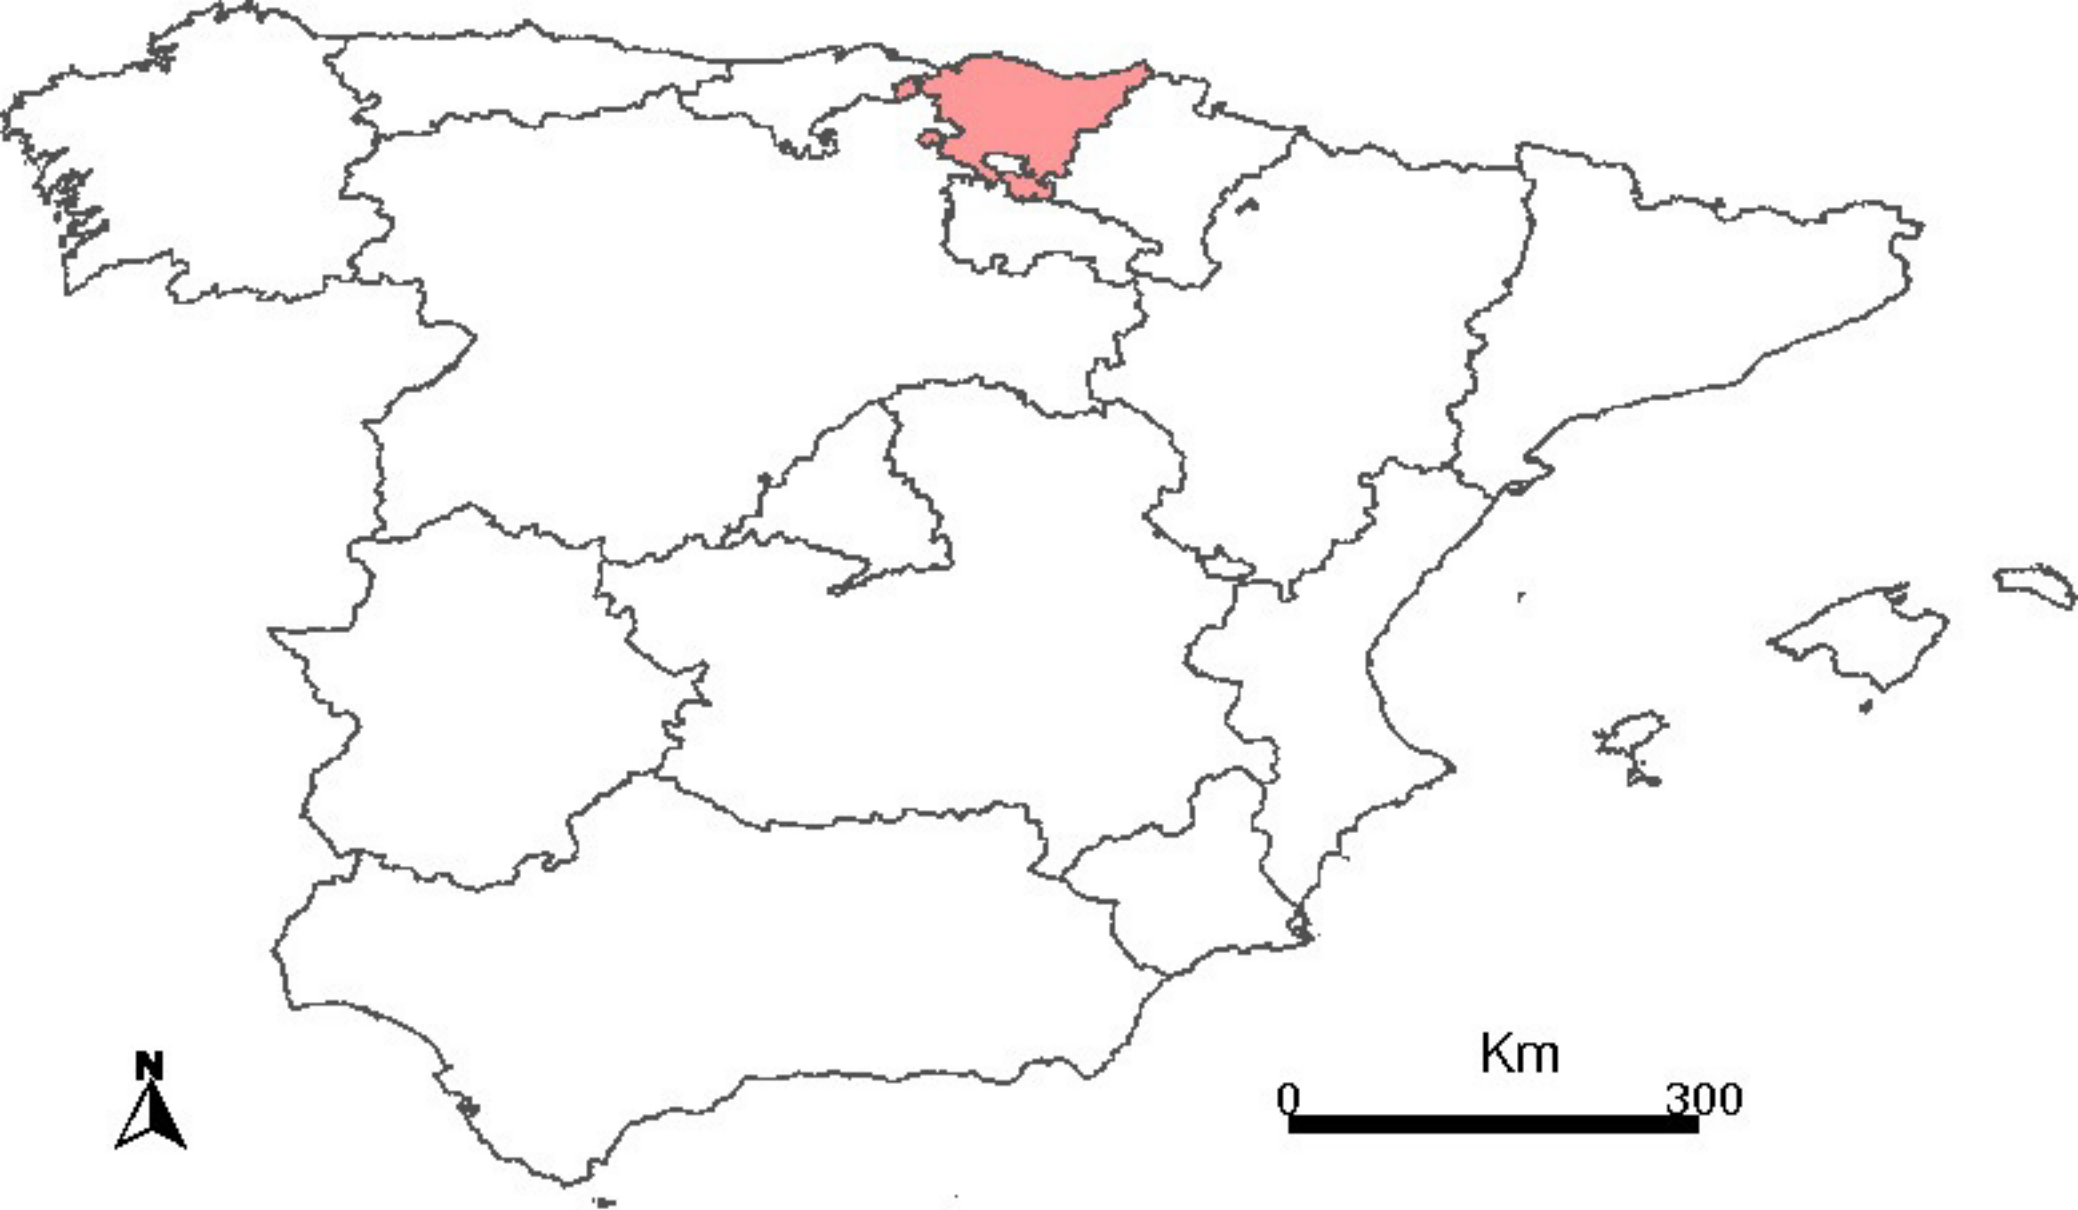

Supplement: s1 [file s1]
